# Supplementary material
Source: PubMed Central journal article supplement (PMC2562063)
Supplement: M804268200_2.pdf [file M804268200_2.pdf]

Table S1. Cold intolerance in WT and *Gdm*<sup>-/-</sup>.*Ucp1*<sup>-/-</sup> mice

|                                                        |        | Acute cold exposure | Cold acclimation  |
|--------------------------------------------------------|--------|---------------------|-------------------|
|                                                        |        | % Cold-intolerant   | % Cold-intolerant |
| WT                                                     | Male   | 0 (n=16)            | 0 (n=11)          |
|                                                        | Female | 0 (n=6)             | 0 (n=6)           |
| <i>Gdm</i> <sup>-/-</sup> . <i>Ucp1</i> <sup>-/-</sup> | Male   | 94 (n=18)           | 10 (n=10)         |
|                                                        | Female | 92 (n=12)           | 20 (n=10)         |

Table S2. Gene expression in liver of cold-adapted WT and *Gdm*<sup>-/-</sup>.*Ucp1*<sup>-/-</sup> mice

| Gene                                    | Liver              |                                                                        | Ratio<br>(B/A) | P-value |
|-----------------------------------------|--------------------|------------------------------------------------------------------------|----------------|---------|
|                                         | WT<br>(n=5)<br>(A) | <i>Gdm</i> <sup>-/-</sup> . <i>Ucp1</i> <sup>-/-</sup><br>(n=5)<br>(B) |                |         |
| Glucose metabolism                      |                    |                                                                        |                |         |
| Glut2                                   | 254±74             | 247±33                                                                 | 1.0            | 0.931   |
| Pepck                                   | 286±149            | 117±26                                                                 | 0.4            | 0.345   |
| Lipid metabolism                        |                    |                                                                        |                |         |
| Acox                                    | 79±12              | 56±3                                                                   | 0.7            | 0.144   |
| Acs11                                   | 33±6               | 26±3                                                                   | 0.8            | 0.304   |
| Acs12                                   | 29±4               | 24±3                                                                   | 0.8            | 0.295   |
| Fasn                                    | 6±2                | 8±2                                                                    | 1.3            | 0.465   |
| CptI                                    | 183±58             | 107±13                                                                 | 0.6            | 0.270   |
| Scd1                                    | 6±1                | 5±2                                                                    | 0.8            | 0.606   |
| Mitochondrial metabolism and transport  |                    |                                                                        |                |         |
| Ant2                                    | 148±64             | 50±5                                                                   | 0.3            | 0.202   |
| Slc25a25                                | 152±42             | 111±12                                                                 | 0.7            | 0.409   |
| mt-co2                                  | 30±4               | 29±1                                                                   | 0.9            | 0.936   |
| Transcription factors and co-activators |                    |                                                                        |                |         |
| Pgc-1alpha                              | 5±1                | 11±3                                                                   | 2.2            | 0.082   |
| PPAR-alpha                              | 85±9               | 73±4                                                                   | 0.8            | 0.282   |
| PPAR-delta                              | 24±11              | 24±5                                                                   | 1.0            | 0.985   |
| Srebp1a                                 | 43±29              | 18±4                                                                   | 0.4            | 0.46    |
| Srebp1c                                 | 26±2               | 31±9                                                                   | 1.2            | 0.626   |
| Srebp2                                  | 52±9               | 66±5                                                                   | 1.3            | 0.241   |
| Calcium cycling                         |                    |                                                                        |                |         |
| Serca2a                                 | 14±1               | 18±1                                                                   | 1.3            | 0.059   |

All values are mean ± SEM. P-value is the result of statistical analysis using Student's t-Test. B/A represents fold-change in gene expression between cold-adapted *Gdm*<sup>-/-</sup>.*Ucp1*<sup>-/-</sup> and WT mice.

Table S3. Gene expression in gastrocnemius red muscle of cold-adapted WT and *Gdm*<sup>-/-</sup>.*Ucp1*<sup>-/-</sup> mice

| Gene                                           | WT<br>(n=5)<br>(A) | Gastrocnemius red<br><i>Gdm</i> <sup>-/-</sup> . <i>Ucp1</i> <sup>-/-</sup><br>(n=5)<br>(B) | Ratio<br>(B/A) | P-value |
|------------------------------------------------|--------------------|---------------------------------------------------------------------------------------------|----------------|---------|
| <b>Glucose metabolism</b>                      |                    |                                                                                             |                |         |
| Glut4                                          | 668 ± 65           | 1056 ± 95                                                                                   | 1.6            | 0.0116  |
| Pdk4                                           | 389 ± 50           | 304 ± 105                                                                                   | 0.8            | 0.503   |
| Pepck                                          | 15 ± 2             | 35 ± 1                                                                                      | 2.3            | 0.0004  |
| <b>Lipid metabolism</b>                        |                    |                                                                                             |                |         |
| Acox                                           | 103 ± 10           | 195 ± 52                                                                                    | 1.9            | 0.160   |
| Acs11                                          | 169 ± 24           | 194 ± 13                                                                                    | 1.1            | 0.400   |
| Acs12                                          | 205 ± 29           | 238 ± 16                                                                                    | 1.1            | 0.369   |
| Fasn                                           | 8.4 ± 0.9          | 18 ± 5                                                                                      | 2.2            | 0.138   |
| Hsl                                            | 7.4 ± 1.4          | 10 ± 2                                                                                      | 1.4            | 0.283   |
| Cpt1                                           | 584 ± 88           | 809 ± 131                                                                                   | 1.4            | 0.195   |
| Scd1                                           | 18 ± 1             | 31 ± 6                                                                                      | 1.7            | 0.108   |
| <b>Mitochondrial metabolism and transport</b>  |                    |                                                                                             |                |         |
| Ant1                                           | 858 ± 160          | 1158 ± 245                                                                                  | 1.3            | 0.338   |
| Ant2                                           | 238 ± 90           | 281 ± 51                                                                                    | 1.2            | 0.685   |
| Slc25a25                                       | 171 ± 14           | 312 ± 42                                                                                    | 1.8            | 0.0236  |
| mt-co2                                         | 451 ± 57           | 705 ± 121                                                                                   | 1.6            | 0.105   |
| <b>Ion transport</b>                           |                    |                                                                                             |                |         |
| Slc20a2                                        | 264 ± 17           | 335 ± 28                                                                                    | 1.2            | 0.067   |
| <b>Transcription factors and co-activators</b> |                    |                                                                                             |                |         |
| Pgc-1alpha                                     | 314 ± 31           | 862 ± 197                                                                                   | 2.7            | 0.051   |
| PPAR-alpha                                     | 143 ± 10           | 420 ± 97                                                                                    | 2.9            | 0.047   |
| PPAR-delta                                     | 56 ± 4             | 93 ± 8                                                                                      | 1.7            | 0.008   |
| PPAR-gamma2                                    | 25 ± 2             | 35 ± 5                                                                                      | 1.4            | 0.158   |
| Srebp1a                                        | 698 ± 431          | 590 ± 457                                                                                   | 0.8            | 0.869   |
| Srebp1c                                        | 86 ± 14            | 72 ± 18                                                                                     | 0.8            | 0.548   |
| Srebp2                                         | 193 ± 38           | 194 ± 26                                                                                    | 1.0            | 0.990   |
| <b>Thermogenesis</b>                           |                    |                                                                                             |                |         |
| Dio2                                           | 43 ± 5             | 34 ± 7                                                                                      | 0.7            | 0.286   |
| <b>Calcium cycling</b>                         |                    |                                                                                             |                |         |
| Serca1a                                        | 602 ± 60           | 667 ± 105                                                                                   | 1.1            | 0.612   |
| Serca2a                                        | 790 ± 123          | 775 ± 45                                                                                    | 1.0            | 0.916   |

All values are mean ± SEM. P-value is result of statistical analysis using Student's t-Test. B/A represents fold-change in gene expression between cold-adapted *Gdm*<sup>-/-</sup>.*Ucp1*<sup>-/-</sup> and WT mice.

Table S4. Gene expression in gastrocnemius white muscle of cold-adapted WT and *Gdm<sup>-/-</sup>.Ucp1<sup>-/-</sup>* mice

| Gene                                           | Gastrocnemius white |                                                             | Ratio<br>(B/A) | P-value |
|------------------------------------------------|---------------------|-------------------------------------------------------------|----------------|---------|
|                                                | WT<br>(n=5)<br>(A)  | <i>Gdm<sup>-/-</sup>.Ucp1<sup>-/-</sup></i><br>(n=5)<br>(B) |                |         |
| <b>Glucose metabolism</b>                      |                     |                                                             |                |         |
| Glut4                                          | 1437 ± 810          | 2005 ± 1056                                                 | 1.4            | 0.014   |
| Pdk4                                           | 353 ± 16            | 663 ± 261                                                   | 1.8            | 0.300   |
| Pepck                                          | 10 ± 3              | 109 ± 10                                                    | 10.4           | 0.119   |
| <b>Lipid metabolism</b>                        |                     |                                                             |                |         |
| Acox                                           | 78 ± 7              | 143 ± 17                                                    | 1.9            | 0.012   |
| Acs11                                          | 94 ± 7              | 167 ± 24                                                    | 1.8            | 0.030   |
| Acs12                                          | 116 ± 6             | 187 ± 23                                                    | 1.6            | 0.027   |
| Fasn                                           | 12 ± 3              | 40 ± 14                                                     | 3.4            | 0.114   |
| Hsl                                            | 10 ± 3              | 20 ± 6                                                      | 1.9            | 0.249   |
| Cpt1                                           | 459 ± 28            | 559 ± 92                                                    | 1.2            | 0.345   |
| Scd1                                           | 40 ± 12             | 65 ± 21                                                     | 1.6            | 0.339   |
| <b>Mitochondrial metabolism and transport</b>  |                     |                                                             |                |         |
| Ant1                                           | 650 ± 140           | 972 ± 159                                                   | 1.5            | 0.166   |
| Ant2                                           | 169 ± 83            | 505 ± 124                                                   | 3.0            | 0.074   |
| Slc25a25                                       | 243 ± 29            | 901 ± 95                                                    | 3.7            | 0.002   |
| mt-co2                                         | 295 ± 41            | 417 ± 39                                                    | 1.4            | 0.0637  |
| <b>Ion transport</b>                           |                     |                                                             |                |         |
| Slc20a2                                        | 176 ± 9             | 262 ± 22                                                    | 1.4            | 0.014   |
| <b>Transcription factors and co-activators</b> |                     |                                                             |                |         |
| Pgc-1alpha                                     | 227 ± 16            | 758 ± 128                                                   | 3.3            | 0.025   |
| PPAR-alpha                                     | 60 ± 3              | 185 ± 24                                                    | 3.1            | 0.006   |
| PPAR-delta                                     | 69 ± 9              | 121 ± 23                                                    | 1.8            | 0.089   |
| PPAR-gamma2                                    | 60 ± 16             | 83 ± 20                                                     | 1.4            | 0.382   |
| Srebp1a                                        | 466 ± 246           | 501 ± 265                                                   | 1.1            | 0.925   |
| Srebp1c                                        | 85 ± 8              | 99 ± 27                                                     | 1.2            | 0.651   |
| Srebp2                                         | 200 ± 31            | 198 ± 27                                                    | 0.9            | 0.954   |
| <b>Thermogenesis</b>                           |                     |                                                             |                |         |
| Dio2                                           | 22 ± 2              | 16 ± 1.1                                                    | 0.7            | 0.048   |
| <b>Calcium cycling</b>                         |                     |                                                             |                |         |
| Serca1a                                        | 1018 ± 197          | 1355 ± 292                                                  | 1.3            | 0.370   |
| Serca2a                                        | 98 ± 10             | 123 ± 21                                                    | 1.2            | 0.339   |

All values are mean ± SEM. P-value is result of statistical analysis using Student's t-Test. B/A represents fold-change in gene expression between cold-adapted *Gdm<sup>-/-</sup>.Ucp1<sup>-/-</sup>* and WT mice.

Table S5. Gene expression in inguinal fat of cold-adapted WT and *Gdm*<sup>-/-</sup>.*Ucp1*<sup>-/-</sup> mice

| Gene                                    | Inguinal Fat       |                                                                        |                | P-value |
|-----------------------------------------|--------------------|------------------------------------------------------------------------|----------------|---------|
|                                         | WT<br>(n=5)<br>(A) | <i>Gdm</i> <sup>-/-</sup> . <i>Ucp1</i> <sup>-/-</sup><br>(n=5)<br>(B) | Ratio<br>(B/A) |         |
| Glucose metabolism                      |                    |                                                                        |                |         |
| Glut4                                   | 88 ± 8             | 205 ± 24                                                               | 2.3            | 0.009   |
| Pdk4                                    | 25 ± 7             | 168 ± 23                                                               | 6.7            | 0.0017  |
| Pepck                                   | 419 ± 62           | 506 ± 192                                                              | 1.2            | 0.689   |
| Lipid metabolism                        |                    |                                                                        |                |         |
| Acox                                    | 83 ± 5             | 100 ± 12                                                               | 1.2            | 0.227   |
| Acs11                                   | 256 ± 44           | 257 ± 39                                                               | 1.0            | 0.987   |
| Acs12                                   | 266 ± 46           | 249 ± 45                                                               | 0.9            | 0.796   |
| Fasn                                    | 356 ± 59           | 677 ± 123                                                              | 1.9            | 0.056   |
| Hsl                                     | 741 ± 188          | 754 ± 122                                                              | 1.0            | 0.956   |
| Cpt1                                    | 40 ± 12            | 256 ± 33                                                               | 6.4            | 0.00158 |
| Scd1                                    | 423 ± 69           | 545 ± 97                                                               | 1.3            | 0.34    |
| Mitochondrial metabolism and transport  |                    |                                                                        |                |         |
| Ant1                                    | 13 ± 2             | 16 ± 2                                                                 | 1.3            | 0.293   |
| Ant2                                    | 183 ± 27           | 433 ± 190                                                              | 2.4            | 0.241   |
| Slc25a25                                | 77 ± 23            | 31 ± 15                                                                | 0.4            | 0.155   |
| mt-co2                                  | 63 ± 5             | 81 ± 15                                                                | 1.3            | 0.285   |
| Ion transport                           |                    |                                                                        |                |         |
| Slc20a2                                 | 27 ± 2             | 45 ± 7                                                                 | 1.7            | 0.046   |
| Transcription factors and co-activators |                    |                                                                        |                |         |
| Pgc-1alpha                              | 45 ± 5             | 82 ± 12                                                                | 1.8            | 0.037   |
| PPAR-alpha                              | 46 ± 9             | 148 ± 17                                                               | 3.2            | 0.0016  |
| PPAR-delta                              | 132 ± 34           | 166 ± 25                                                               | 1.3            | 0.438   |
| PPAR-gamma2                             | 606 ± 59           | 282 ± 58                                                               | 0.5            | 0.0044  |
| Srebp1a                                 | 228 ± 106          | 263 ± 123                                                              | 1.1            | 0.837   |
| Srebp1c                                 | 468 ± 21           | 336 ± 70                                                               | 0.7            | 0.143   |
| Srebp2                                  | 140 ± 5            | 80 ± 9                                                                 | 0.5            | 0.00152 |
| Thermogenesis                           |                    |                                                                        |                |         |
| Dio2                                    | 74 ± 10            | 468 ± 114                                                              | 6.3            | 0.025   |
| Calcium cycling                         |                    |                                                                        |                |         |
| Serca2a                                 | 36 ± 2             | 48 ± 5                                                                 | 1.3            | 0.101   |

All values are mean ± SEM. P-value is the result of statistical analysis using Student's t-Test. B/A represents fold-change in gene expression between cold-adapted *Gdm*<sup>-/-</sup>.*Ucp1*<sup>-/-</sup> and WT mice.

Table S6. Gene expression in liver of WT and *Gdm*<sup>-/-</sup>.*Ucp1*<sup>-/-</sup> mice fed a high fat diet and kept at 20°C for 10 weeks and at 28 °C for another 10 weeks

| Gene                                           | Liver              |                                                                        |                | P-value |
|------------------------------------------------|--------------------|------------------------------------------------------------------------|----------------|---------|
|                                                | WT<br>(n=5)<br>(A) | <i>Gdm</i> <sup>-/-</sup> . <i>Ucp1</i> <sup>-/-</sup><br>(n=5)<br>(B) | Ratio<br>(B/A) |         |
| <b>Glucose metabolism</b>                      |                    |                                                                        |                |         |
| G6Pase                                         | 178 ± 52           | 288 ± 36                                                               | 1.6            | 0.123   |
| Glut2                                          | 236 ± 27           | 189 ± 19                                                               | 0.8            | 0.203   |
| Pdk4                                           | 2.1 ± 0.3          | 1.1 ± 0.1                                                              | 0.5            | 0.041   |
| Pepck                                          | 88 ± 43            | 223 ± 59                                                               | 2.5            | 0.108   |
| <b>Lipid metabolism</b>                        |                    |                                                                        |                |         |
| Acox                                           | 124 ± 8            | 92 ± 12                                                                | 0.74           | 0.082   |
| Acs11                                          | 41 ± 8             | 46 ± 5                                                                 | 1.1            | 0.626   |
| Acs12                                          | 43 ± 4             | 57 ± 5                                                                 | 1.3            | 0.053   |
| CptI                                           | 540 ± 209          | 149 ± 23                                                               | 0.3            | 0.159   |
| Fasn                                           | 26 ± 7             | 16 ± 5                                                                 | 0.6            | 0.288   |
| Hsl                                            | 2 ± 0.2            | 5 ± 1                                                                  | 1.9            | 0.182   |
| Scd1                                           | 31 ± 2             | 13 ± 2                                                                 | 0.4            | 0.00038 |
| <b>Mitochondrial metabolism and transport</b>  |                    |                                                                        |                |         |
| Ant2                                           | 241 ± 49           | 155 ± 54                                                               | 0.6            | 0.273   |
| mt-co2                                         | 46 ± 12            | 33 ± 4                                                                 | 0.7            | 0.352   |
| Slc25a25                                       | 94 ± 19            | 75 ± 5                                                                 | 0.8            | 0.366   |
| <b>Transcription factors and co-activators</b> |                    |                                                                        |                |         |
| Pgc-1alpha                                     | 14 ± 1             | 14 ± 4                                                                 | 1.0            | 0.933   |
| PPAR-alpha                                     | 169 ± 8            | 221 ± 26                                                               | 1.3            | 0.161   |
| PPAR-delta                                     | 30 ± 15            | 13 ± 2                                                                 | 0.4            | 0.322   |
| PPAR-gamma2                                    | 18 ± 6             | 6 ± 4                                                                  | 0.3            | 0.069   |
| Srebp1a                                        | 52 ± 6             | 39 ± 4                                                                 | 0.75           | 0.107   |
| Srebp1c                                        | 76 ± 14            | 91 ± 13                                                                | 1.2            | 0.443   |
| <b>Calcium cycling</b>                         |                    |                                                                        |                |         |
| Serca2a                                        | 18 ± 4             | 10 ± 1                                                                 | 0.6            | 0.165   |

All values are mean ± SEM. P-value is result of statistical analysis using Student's t-Test. B/A represents fold-change in gene expression between *Gdm*<sup>-/-</sup>.*Ucp1*<sup>-/-</sup> and WT mice fed a high fat diet.

Table S7. Gene expression in gastrocnemius red muscle of WT and *Gdm<sup>-/-</sup>.Ucp1<sup>-/-</sup>* mice fed a high fat diet and kept at 20°C for 10 weeks and at 28 °C for another 10 weeks

| Gene                                           | Gastrocnemius red  |                                                             |                | P-value |
|------------------------------------------------|--------------------|-------------------------------------------------------------|----------------|---------|
|                                                | WT<br>(n=5)<br>(A) | <i>Gdm<sup>-/-</sup>.Ucp1<sup>-/-</sup></i><br>(n=5)<br>(B) | Ratio<br>(B/A) |         |
| <b>Glucose metabolism</b>                      |                    |                                                             |                |         |
| Glut4                                          | 735±77             | 737±37                                                      | 1.0            | 0.984   |
| Pdk4                                           | 1225±179           | 1595±360                                                    | 1.3            | 0.392   |
| Pepck                                          | 88±36              | 68±47                                                       | 0.8            | 0.74    |
| <b>Lipid metabolism</b>                        |                    |                                                             |                |         |
| Acox                                           | 86±6               | 79±6                                                        | 0.9            | 0.463   |
| Acs11                                          | 237±51             | 226±22                                                      | 0.9            | 0.846   |
| Acs12                                          | 255±52             | 229±23                                                      | 0.9            | 0.665   |
| Fasn                                           | 9±2                | 14±4                                                        | 1.5            | 0.365   |
| Hsl                                            | 88±26              | 55±6                                                        | 0.6            | 0.291   |
| Cpt1                                           | 1005±210           | 772±53                                                      | 0.7            | 0.493   |
| Scd1                                           | 16±4               | 11±2                                                        | 0.7            | 0.333   |
| <b>Mitochondrial metabolism and transport</b>  |                    |                                                             |                |         |
| Ant1                                           | 2495±830           | 1741±656                                                    | 0.7            | 0.496   |
| Ant2                                           | 277±50             | 197±47                                                      | 0.7            | 0.279   |
| Slc25a25                                       | 228±40             | 161±42                                                      | 0.7            | 0.279   |
| mt-co2                                         | 735±181            | 539±47                                                      | 0.7            | 0.342   |
| <b>Ion transport</b>                           |                    |                                                             |                |         |
| Slc20a2                                        | 248±12             | 238±14                                                      | 0.9            | 0.605   |
| <b>Transcription factors and co-activators</b> |                    |                                                             |                |         |
| Pgc-1alpha                                     | 841±67             | 970±306                                                     | 1.2            | 0.702   |
| PPAR-alpha                                     | 396±110            | 428±172                                                     | 1.1            | 0.879   |
| PPAR-delta                                     | 450±9.5            | 495±38                                                      | 1.1            | 0.295   |
| PPAR-gamma2                                    | 14±2.4             | 17±3                                                        | 1.3            | 0.399   |
| Sreb1a                                         | 226±28             | 192±13                                                      | 0.8            | 0.307   |
| Sreb1c                                         | 121±12             | 129±14                                                      | 1.1            | 0.647   |
| <b>Thermogenesis</b>                           |                    |                                                             |                |         |
| Dio2                                           | 287±17             | 231±17*                                                     | 0.8            | 0.046   |
| <b>Calcium cycling</b>                         |                    |                                                             |                |         |
| Serca1a                                        | 757±64             | 887±64                                                      | 1.2            | 0.190   |
| Serca2a                                        | 1121±125           | 1164±273                                                    | 1.0            | 0.89    |

All values are mean ± SEM. P-value is result of statistical analysis using Student's t-Test. B/A represents fold-change in gene expression between *Gdm<sup>-/-</sup>.Ucp1<sup>-/-</sup>* and WT mice fed a high fat diet.

Table S8. Gene expression in gastrocnemius white muscle of WT and *Gdm*<sup>-/-</sup>.*Ucp1*<sup>-/-</sup> mice fed a high fat diet and kept at 20°C for 10 weeks and at 28 °C for another 10 weeks

| Gene                                           | Gastrocnemius white |                                                                        |                | P-value |
|------------------------------------------------|---------------------|------------------------------------------------------------------------|----------------|---------|
|                                                | WT<br>(n=5)<br>(A)  | <i>Gdm</i> <sup>-/-</sup> . <i>Ucp1</i> <sup>-/-</sup><br>(n=5)<br>(B) | Ratio<br>(B/A) |         |
| <b>Glucose metabolism</b>                      |                     |                                                                        |                |         |
| Glut4                                          | 720±140             | 775±111                                                                | 1.1            | 0.766   |
| Pdk4                                           | 279±69              | 551±71                                                                 | 1.9            | 0.025   |
| Pepck                                          | 68±28               | 244±84                                                                 | 3.6            | 0.104   |
| <b>Lipid metabolism</b>                        |                     |                                                                        |                |         |
| Acox                                           | 41±4                | 53±7                                                                   | 1.3            | 0.213   |
| Acs11                                          | 71±16               | 70±17                                                                  | 1.0            | 0.958   |
| Acs12                                          | 91±15               | 93±16                                                                  | 1.0            | 0.906   |
| Fasn                                           | 13±2                | 26±7                                                                   | 2.0            | 0.149   |
| Hsl                                            | 90±31               | 108±28                                                                 | 1.2            | 0.662   |
| Cpt1                                           | 417±91              | 383±87                                                                 | 0.9            | 0.794   |
| Scd1                                           | 42±27               | 40±10                                                                  | 0.9            | 0.931   |
| <b>Mitochondrial metabolism and transport</b>  |                     |                                                                        |                |         |
| Ant1                                           | 854±194             | 1414±301                                                               | 1.7            | 0.161   |
| Ant2                                           | 138±14              | 191±27                                                                 | 1.4            | 0.127   |
| Slc25a25                                       | 244±49              | 276±79                                                                 | 1.1            | 0.734   |
| mt-co2                                         | 351±85              | 338±65                                                                 | 0.9            | 0.908   |
| <b>Ion transport</b>                           |                     |                                                                        |                |         |
| Slc20a2                                        | 98±6                | 100±8                                                                  | 1.0            | 0.805   |
| <b>Transcription factors and co-activators</b> |                     |                                                                        |                |         |
| Pgc-1alpha                                     | 368±17              | 396±61                                                                 | 1.1            | 0.677   |
| PPAR-alpha                                     | 65±17               | 97±29                                                                  | 1.5            | 0.383   |
| PPAR-delta                                     | 457±45              | 476±45                                                                 | 1.0            | 0.772   |
| PPAR-gamma2                                    | 26±7                | 49±11                                                                  | 1.9            | 0.118   |
| Sreb1a                                         | 281±27              | 262±24                                                                 | 0.9            | 0.613   |
| Sreb1c                                         | 206±26              | 241±40                                                                 | 1.2            | 0.487   |
| <b>Thermogenesis</b>                           |                     |                                                                        |                |         |
| Dio2                                           | 94±15               | 124±14                                                                 | 1.3            | 0.173   |
| <b>Calcium cycling</b>                         |                     |                                                                        |                |         |
| Serca1a                                        | 1002±29             | 919±153                                                                | 0.9            | 0.623   |
| Serca2a                                        | 66±10               | 102±21                                                                 | 1.5            | 0.179   |

All values are mean ± SEM. P-value is result of statistical analysis using Student's t-Test. B/A represents fold-change in gene expression between *Gdm*<sup>-/-</sup>.*Ucp1*<sup>-/-</sup> and WT mice fed a high fat diet.



Table S9. Gene expression in inguinal fat of WT and *Gdm<sup>-/-</sup>.Ucp1<sup>-/-</sup>* mice fed a high fat diet and kept at 20°C for 10 weeks and at 28 °C for another 10 weeks

| Gene                                           | Inguinal fat       |                                                             |                | P-value |
|------------------------------------------------|--------------------|-------------------------------------------------------------|----------------|---------|
|                                                | WT<br>(n=5)<br>(A) | <i>Gdm<sup>-/-</sup>.Ucp1<sup>-/-</sup></i><br>(n=5)<br>(B) | Ratio<br>(B/A) |         |
| <b>Glucose metabolism</b>                      |                    |                                                             |                |         |
| Glut4                                          | 40±4.7             | 108±16                                                      | 2.7            | 0.028   |
| Pdk4                                           | 11±1               | 75±27                                                       | 6.7            | 0.097   |
| Pepck                                          | 118±39             | 4352±1960                                                   | 36.8           | 0.097   |
| <b>Lipid metabolism</b>                        |                    |                                                             |                |         |
| Acox                                           | 72±7               | 126±12                                                      | 1.7            | 0.012   |
| Acs11                                          | 204±24             | 241±39                                                      | 1.2            | 0.445   |
| Acs12                                          | 197±25             | 313±42                                                      | 1.6            | 0.049   |
| Fasn                                           | 220±25             | 355±51                                                      | 1.6            | 0.075   |
| Hsl                                            | 229±23             | 479±19                                                      | 2.1            | 0.00003 |
| Cpt1                                           | 10.3±1.1           | 95±22                                                       | 9.3            | 0.018   |
| Scd1                                           | 299±61             | 615±29                                                      | 2.1            | 0.0034  |
| <b>Mitochondrial metabolism and transport</b>  |                    |                                                             |                |         |
| Ant1                                           | 14±2               | 53±16                                                       | 3.9            | 0.092   |
| Ant2                                           | 167±29             | 323±61                                                      | 1.9            | 0.082   |
| Slc25a25                                       | 122±7              | 343±55                                                      | 2.8            | 0.028   |
| mt-co2                                         | 45±6.7             | 117±16                                                      | 2.6            | 0.008   |
| <b>Ion transport</b>                           |                    |                                                             |                |         |
| Slc20a2                                        | 18±1               | 40±5                                                        | 2.3            | 0.0095  |
| <b>Transcription factors and co-activators</b> |                    |                                                             |                |         |
| Pgc-1alpha                                     | 17±2               | 237±58                                                      | 14             | 0.032   |
| PPAR-alpha                                     | 14±2               | 151±41                                                      | 10.8           | 0.044   |
| PPAR-delta                                     | 131±12             | 234±16                                                      | 1.8            | 0.0024  |
| PPAR-gamma2                                    | 317±30             | 805±91                                                      | 2.5            | 0.007   |
| Srebp1a                                        | 132±9              | 202±23                                                      | 1.5            | 0.038   |
| Srebp1c                                        | 139±9              | 317±46                                                      | 2.3            | 0.0197  |
| Srebp2                                         | 107±10             | 174±37                                                      | 1.6            | 0.173   |
| <b>Thermogenesis</b>                           |                    |                                                             |                |         |
| Dio2                                           | 9±2                | 277±8                                                       | 30.3           | 0.045   |
| <b>Calcium cycling</b>                         |                    |                                                             |                |         |
| Serca2a                                        | 37±3               | 64±7                                                        | 1.7            | 0.024   |

All values are mean ± SEM. P-value is result of statistical analysis using Student's t-Test. B/A represents fold-change in gene expression between *Gdm<sup>-/-</sup>.Ucp1<sup>-/-</sup>* and WT mice fed a high fat diet.

Table S10. Blood and tissue metabolites in WT and *Gdm*<sup>-/-</sup>.*Ucp*<sup>-/-</sup> mice fed chow and adapted to 4°C, and in WT and *Gdm*<sup>-/-</sup>.*Ucp*<sup>-/-</sup> mice fed a high fat diet and reared at 20°C for 10 weeks, then at 28°C for 10 weeks

|                                   | WT              | <i>Gdm</i> <sup>-/-</sup> . <i>Ucp</i> <sup>-/-</sup> | P-value |
|-----------------------------------|-----------------|-------------------------------------------------------|---------|
| Chow, 4°C                         |                 |                                                       |         |
| Serum L-lactic acid (mg/dl)       | 25.9 ± 1.3 (6)  | 29.7 ± 4.1 (5)                                        | 0.378   |
| Serum triglyceride (mg/dl)        | 71.7 ± 11.2 (6) | 56.2 ± 4.8 (5)                                        | 0.204   |
| Serum ketone (mg/dl)              | 5.2 ± 0.2 (6)   | 6.0 ± 0.4 (5)                                         | 0.065   |
| Blood glucose (mg/dl)             | 111 ± 3 (6)     | 104 ± 3 (5)                                           | 0.132   |
| Serum T3 (ng/dl)                  | 70 ± 12 (6)     | 92 ± 3 (8)                                            | 0.133   |
| Serum T4 (µg/dl)                  | 8.1 ± 0.3 (6)   | 8.4 ± 0.3 (8)                                         | 0.532   |
| High fat diet, 20°C and 28°C      |                 |                                                       |         |
| Fasting blood glucose (mg/dl)     | 143 ± 9 (7)     | 123 ± 10 (7)                                          | 0.070   |
| Serum T3(ng/dl)                   | 81 ± 5 (5)      | 88 ± 3 (5)                                            | 0.310   |
| Serum T4 (ug/dl)                  | 7.7 ± 0.7 (5)   | 8.4 ± 0.2 (5)                                         | 0.417   |
| Liver triglycerides (mg/g tissue) | 110 ± 13 (6)    | 81 ± 8 (6)                                            | 0.040   |
| Skeletal muscle (mg/g tissue)     | 170 ± 18 (6)    | 129 ± 11 (6)                                          | 0.052   |

All values are mean ± SEM. Values in parenthesis correspond to number of animals examined. P-value is the result of statistical analysis using Student's t-test.
