# Supplementary material
Source: PubMed Central journal article supplement (PMC2562063)

Supplementary Fig. 1

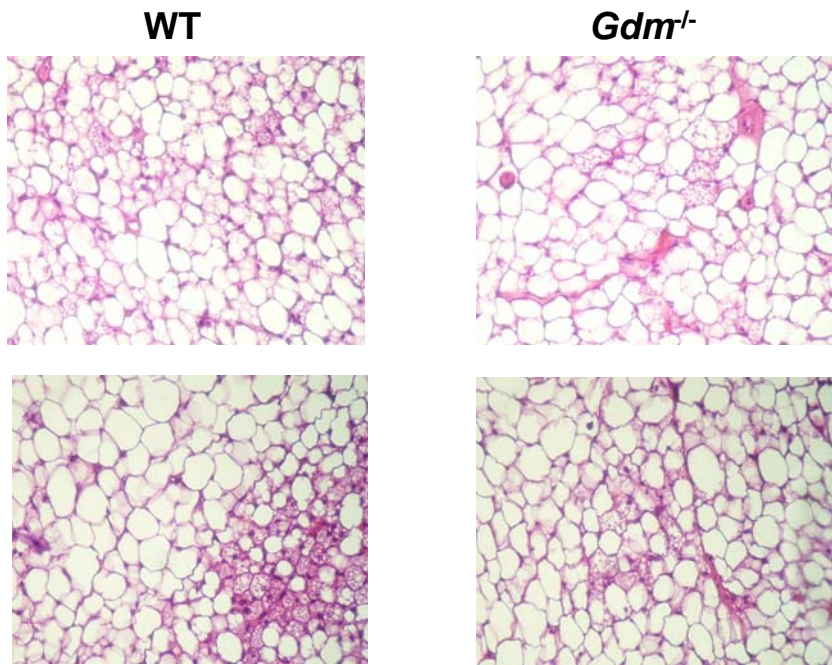

**High fat diet (10 weeks, 20°C; 10 weeks, 28°C)**

Supplement: M804268200_1.pdf [file M804268200_1.pdf]
